# Supplementary material for: Structure and properties of metal complexes of a pyridine based oxazolidinone synthesized by atmospheric CO2fixation
Source: Royal Society of Chemistry journal article supplement (doi:10.1039/c3nj00990d), 2014-01-01
Supplement: c3nj00990d.pdf [file c3nj00990d.pdf]

## Supporting Information

### **Structure and properties of metal complexes of a pyridine based oxazolidinone synthesized by atmospheric CO<sub>2</sub> fixation**

Amrita Sarkar,<sup>a</sup> Sudipta Bhattacharyya,<sup>a</sup> Suman Kr Dey,<sup>a</sup> Subhendu Karmakar<sup>a</sup> and Arindam Mukherjee\*<sup>a</sup>

Department of Chemical Sciences Indian Institute of Science Education & Research Kolkata,  
Mohanpur Campus, P.O.- BCKV Main Campus, District- Nadia, Pin- 741252, INDIA.

Fax: (+91)033-25873118; Tel: (+91)033-25873121; E-mail: [a.mukherjee@iiserkol.ac.in](mailto:a.mukherjee@iiserkol.ac.in)

## Contents:

**Table S1** Crystallographic data and refinement parameters for complexes **1-3**.

**Table S2** Screening of solvent for the reaction of 4-bromoanisole and phenylboronic acid.

**Scheme S1** Proposed catalytic cycle for Suzuki-Miyaura Coupling by complex **3** in presence of base.

**Fig. S1** Effects of treatment of the complexes **1-3** with MCF-7 tumor cell line for 48 h with rising concentrations: (A) **1**, (B) **2**, (C) **3**. The  $IC_{50}$  obtained from the curves are calculated using GraphPad Prism 5.0<sup>®</sup>. Data are mean  $\pm$  SD of three independent experiments.

**Fig. S2** Effects of treatment of the complexes **1-3** with A549 tumor cell line for 48 h with rising concentrations: (A) **1**, (B) **2**, (C) **3**. The  $IC_{50}$  obtained from the curves are calculated using GraphPad Prism 5.0<sup>®</sup>. Data are mean  $\pm$  SD of three independent experiments.

**Fig. S3** Effects of treatment of the complexes **1-3** with NIH 3T3 tumor cell line for 48 h with rising concentrations: (A) **1**, (B) **2**, (C) **3**. The  $IC_{50}$  obtained from the curves are calculated using GraphPad Prism 5.0<sup>®</sup>. Data are mean  $\pm$  SD of three independent experiments.

**Fig. S4** <sup>1</sup>H-NMR of ligand L.

**Fig. S5** <sup>13</sup>C-NMR of ligand L.

**Fig. S6** <sup>1</sup>H-NMR of biphenyl in CDCl<sub>3</sub>.

**Fig. S7** <sup>13</sup>C-NMR of biphenyl in CDCl<sub>3</sub>.

**Fig. S8** <sup>1</sup>H-NMR of 4-methylbiphenyl in CDCl<sub>3</sub>.

**Fig. S9** <sup>13</sup>C-NMR of 4-methylbiphenyl in CDCl<sub>3</sub>.

**Fig. S10** <sup>1</sup>H-NMR of 4-methoxybiphenyl in CDCl<sub>3</sub>.

**Fig. S11** <sup>13</sup>C-NMR of 4-methoxybiphenyl in CDCl<sub>3</sub>.

**Fig. S12** <sup>1</sup>H-NMR of 4-acetylbiphenyl in CDCl<sub>3</sub>.

**Fig. S13** <sup>13</sup>C-NMR of 4-acetylbiphenyl in CDCl<sub>3</sub>.

**Fig. S14** <sup>1</sup>H-NMR of 4-nitrobiphenyl in CDCl<sub>3</sub>.

**Fig. S15** <sup>13</sup>C-NMR of 4-nitrobiphenyl in CDCl<sub>3</sub>.

**Fig. S16** <sup>1</sup>H-NMR of 4-cyanobiphenyl in CDCl<sub>3</sub>.

**Fig. S17** <sup>13</sup>C-NMR of 4-cyanobiphenyl in CDCl<sub>3</sub>.

**Fig. S18** <sup>1</sup>H-NMR of 2-phenylpyridine in CDCl<sub>3</sub>.

**Fig. S19** <sup>13</sup>C-NMR of 2-phenylpyridine in CDCl<sub>3</sub>.

**Table S1** Crystallographic data and structure refinement parameters for complexes **1-3**.

|                                                                                                      | <b>1</b>                                                                          | <b>2</b>                                                                               | <b>3<sup>a</sup></b>                                                             |
|------------------------------------------------------------------------------------------------------|-----------------------------------------------------------------------------------|----------------------------------------------------------------------------------------|----------------------------------------------------------------------------------|
| <b>Empirical formula</b>                                                                             | C <sub>18</sub> H <sub>20</sub> Cl <sub>2</sub> N <sub>4</sub> O <sub>12</sub> Cu | <b>C<sub>11</sub> H<sub>17</sub> Cl<sub>2</sub> N<sub>2</sub> O<sub>3.5</sub> Pt S</b> | C <sub>18</sub> H <sub>20</sub> Cl <sub>2</sub> N <sub>4</sub> O <sub>4</sub> Pd |
| <b>F<sub>w</sub> (g mol<sup>-1</sup>)</b>                                                            | 618.83                                                                            | <b>531.32</b>                                                                          | 533.68                                                                           |
| Temperature(K)                                                                                       | 100(2)                                                                            | 100(2)                                                                                 | 100(2)                                                                           |
| Crystal system                                                                                       | Monoclinic                                                                        | Triclinic                                                                              | Monoclinic                                                                       |
| space group                                                                                          | <i>P</i> 2(1)/ <i>c</i>                                                           | <i>P</i> -1                                                                            | <i>P</i> 2(1)                                                                    |
| Crystal size/mm                                                                                      | 0.65 x 0.32 x 0.17                                                                | 0.68 x 0.34 x 0.15                                                                     | 0.54x0.33x0.19                                                                   |
| <i>a</i> (Å)                                                                                         | 9.0019(4)                                                                         | 8.128(17)                                                                              | 8.239(2)                                                                         |
| <i>b</i> (Å)                                                                                         | 8.0278 (3)                                                                        | 13.281(3)                                                                              | 13.553(2)                                                                        |
| <i>c</i> (Å)                                                                                         | 16.0297(7)                                                                        | 14.755(3)                                                                              | 9.605(2)                                                                         |
| <i>α</i> (°)                                                                                         | 90                                                                                | 97.093(4)                                                                              | 90.00                                                                            |
| <i>β</i> (°)                                                                                         | 99.170(2)                                                                         | 94.263(4)                                                                              | 106.362(3)                                                                       |
| <i>γ</i> (°)                                                                                         | 90                                                                                | 96.436(4)                                                                              | 90.00                                                                            |
| <i>V</i> (Å <sup>3</sup> )                                                                           | 1143.6(8)                                                                         | 1564.3(6)                                                                              | 1029.1(3)                                                                        |
| <i>Z</i>                                                                                             | 2                                                                                 | 4                                                                                      | 2                                                                                |
| <i>D<sub>c</sub></i> (g/cm <sup>-3</sup> )                                                           | 1.797                                                                             | 2.256                                                                                  | 1.722                                                                            |
| <i>μ</i> (mm <sup>-1</sup> )                                                                         | 1.263                                                                             | 9.455                                                                                  | 1.194                                                                            |
| F(000)                                                                                               | 560                                                                               | 1012                                                                                   | 536                                                                              |
| Limiting indices                                                                                     | -12< <i>h</i> <12,<br>-9< <i>k</i> <10,<br>-21< <i>l</i> <18                      | -6< <i>h</i> <10,<br>-16< <i>k</i> <16,<br>-18< <i>l</i> <18                           | -10< <i>h</i> <10,<br>-17< <i>k</i> <17,<br>-12< <i>l</i> <12                    |
| Reflections collected                                                                                | 9539                                                                              | 23983                                                                                  | 16687                                                                            |
| Flack parameter                                                                                      | -                                                                                 | -                                                                                      | 0.45(6)                                                                          |
| Unique Reflections/ <i>R</i> <sub>int</sub>                                                          | 2850/ 0.0341                                                                      | 6388/ 0.0365                                                                           | 4712/ 0.0429                                                                     |
| Data / restraints / parameters                                                                       | 2850 / 0 / 169                                                                    | 6388 / 0 / 375                                                                         | 4712 / 1 / 263                                                                   |
| Goodness-of-fit <sup>b</sup> on F <sup>2</sup>                                                       | 1.033                                                                             | 1.047                                                                                  |                                                                                  |
| <i>R</i> <sub>1</sub> <sup>c</sup> , <i>wR</i> <sub>2</sub> <sup>d</sup> [ <i>I</i> >2σ( <i>I</i> )] | 0.0420/ 0.1092                                                                    | 0.0192/ 0.0495                                                                         |                                                                                  |
| <i>R</i> <sub>1</sub> , <i>wR</i> <sub>2</sub> (all data)                                            | 0.0610/ 0.1208                                                                    | 0.0211/ 0.0507                                                                         |                                                                                  |
| <i>Δρ</i> <sub>max/min</sub> /e Å <sup>-3</sup>                                                      | 0.869 / -0.599                                                                    | 1.370/ -1.376                                                                          |                                                                                  |

<sup>a</sup> it was not possible to derive a fully acceptable structure hence the structure is not published here. <sup>b</sup> Goodness-of-fit=[Σ*w*(*F*<sub>o</sub><sup>2</sup> - *F*<sub>c</sub><sup>2</sup>)<sup>2</sup>]/(*N*<sub>reflection</sub> - *N*<sub>params</sub>)<sup>1/2</sup>, based on all data. <sup>c</sup> *R*<sub>1</sub> = Σ (|*F*<sub>o</sub>| - |*F*<sub>c</sub>|)/|*F*<sub>o</sub>|. <sup>d</sup> *wR*<sub>2</sub> = [R [Σ (*F*<sub>o</sub><sup>2</sup> - *F*<sub>c</sub><sup>2</sup>)<sup>2</sup>]/R[Σ(*F*<sub>o</sub><sup>2</sup>)<sup>2</sup>]<sup>1/2</sup>.

**Table S2** Screening of solvent for the reaction of 4-bromoanisole and phenylboronic acid<sup>[a]</sup>

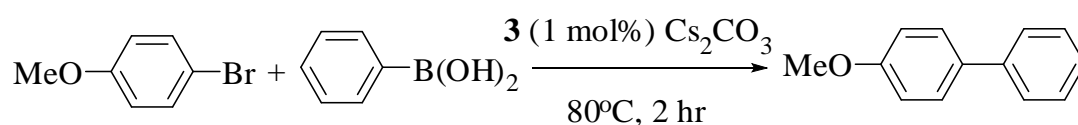

| Entry | Solvent          | % Yield <sup>[b]</sup> |
|-------|------------------|------------------------|
| 1     | H <sub>2</sub> O | 90                     |
| 2     | EtOH             | 92                     |
| 3     | MeCN             | 86                     |

<sup>[a]</sup>Reaction conditions: 4-bromoanisole (0.093 g, 0.5 mmol), phenylboronic acid (0.0915 g, 0.75 mmol), Cs<sub>2</sub>CO<sub>3</sub> (1.5 mmol), <sup>[b]</sup>Isolated yield after column chromatography.

**Scheme S1**

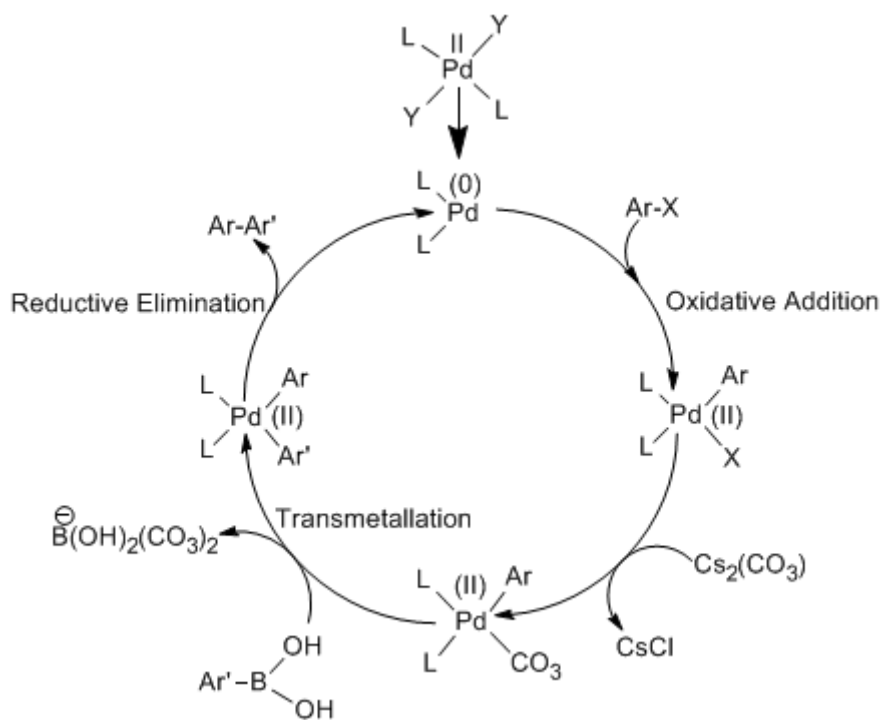

**Scheme S1** Proposed catalytic cycle for Suzuki-Miyaura Coupling by complex **3** in presence of base.

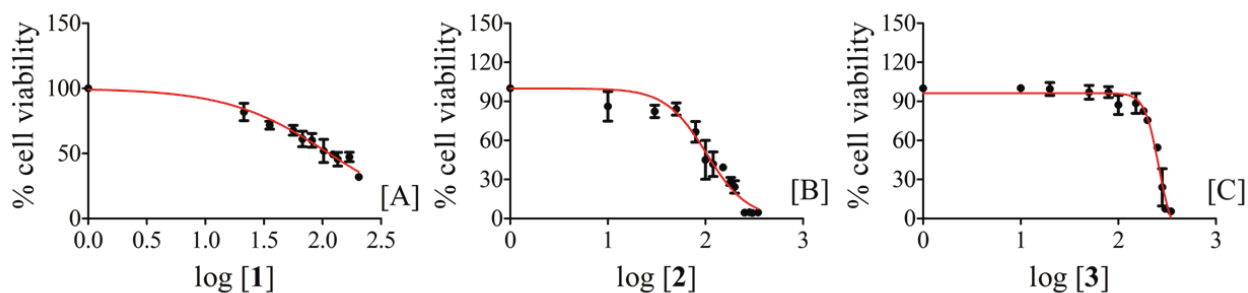

**Fig. S1** Effects of treatment of the complexes **1-3** with MCF-7 tumor cell line for 48 h with rising concentrations: (A) **1**, (B) **2**, (C) **3**. The  $IC_{50}$  obtained from the curves are calculated using GraphPad Prism 5.0<sup>®</sup>. Data are mean  $\pm$  SD of three independent experiments.

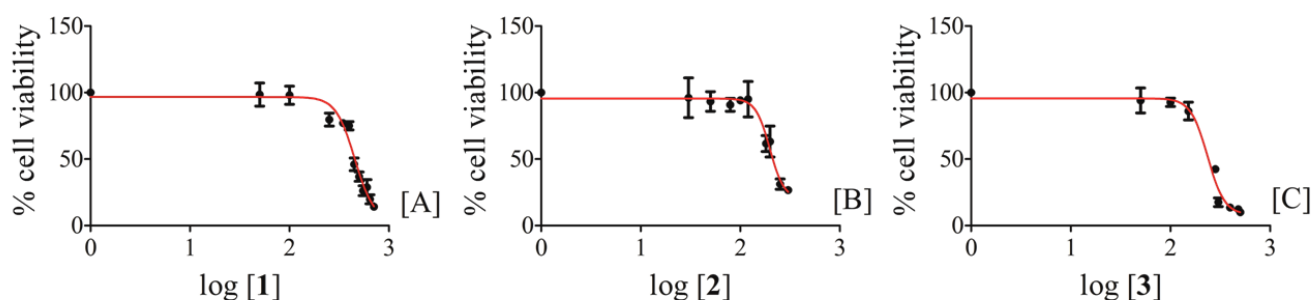

**Fig. S2** Effects of treatment of the complexes **1-3** with A549 tumor cell line for 48 h with rising concentrations: (A) **1**, (B) **2**, (C) **3**. The  $IC_{50}$  obtained from the curves are calculated using GraphPad Prism 5.0<sup>®</sup>. Data are mean  $\pm$  SD of three independent experiments.

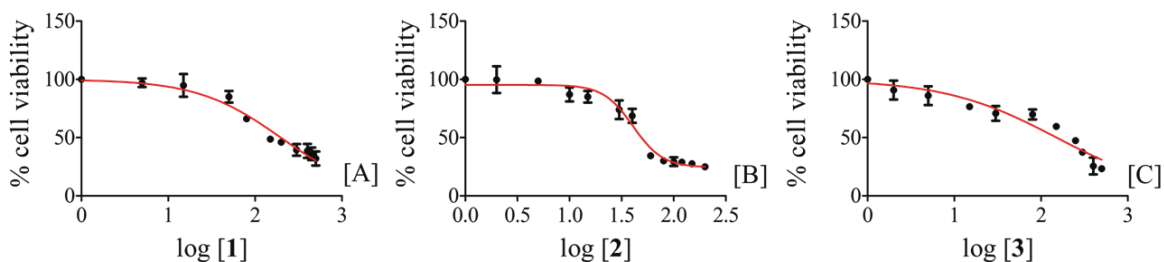

**Fig. S3** Effects of treatment of the complexes **1-3** with NIH 3T3 tumor cell line for 48 h with rising concentrations: (A) **1**, (B) **2**, (C) **3**. The  $IC_{50}$  obtained from the curves are calculated using GraphPad Prism 5.0<sup>®</sup>. Data are mean  $\pm$  SD of three independent experiments.

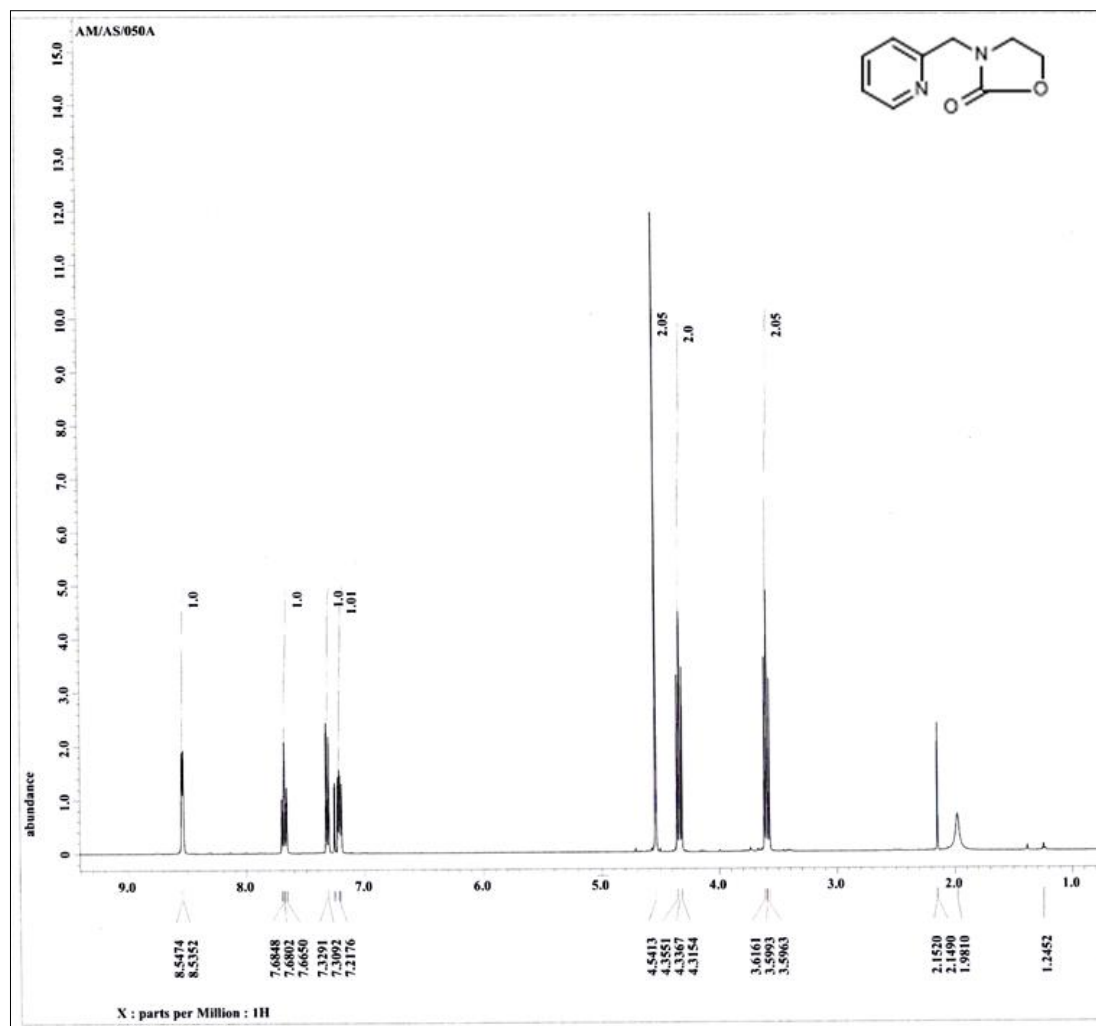

Fig. S4  $^1\text{H-NMR}$  of ligand L.

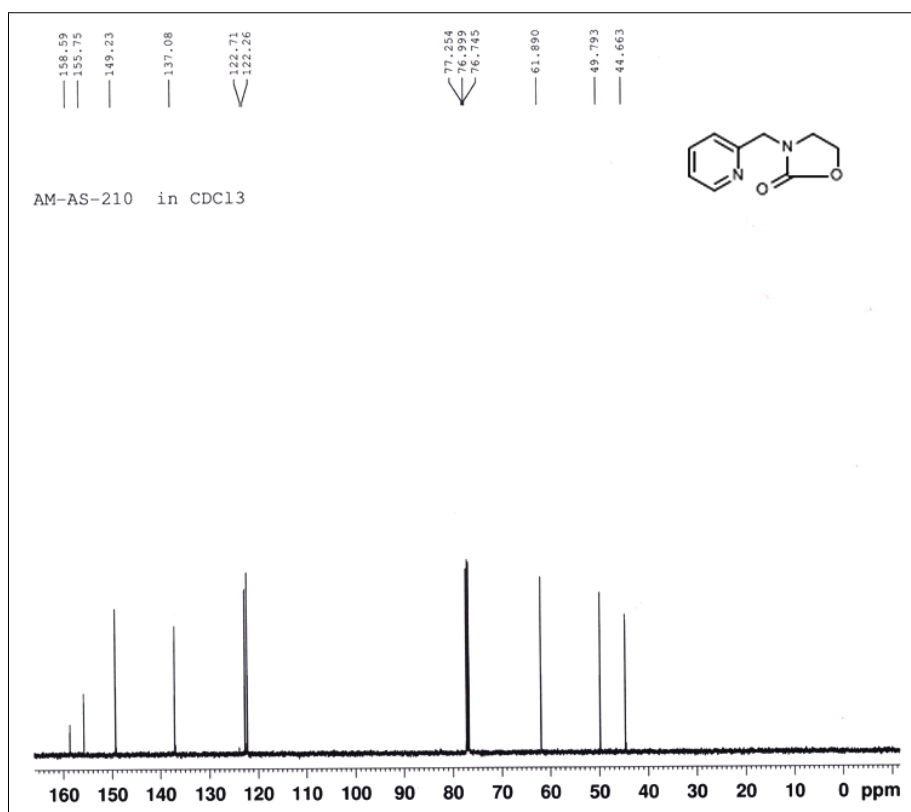

Fig. S5 <sup>13</sup>C-NMR of ligand L.

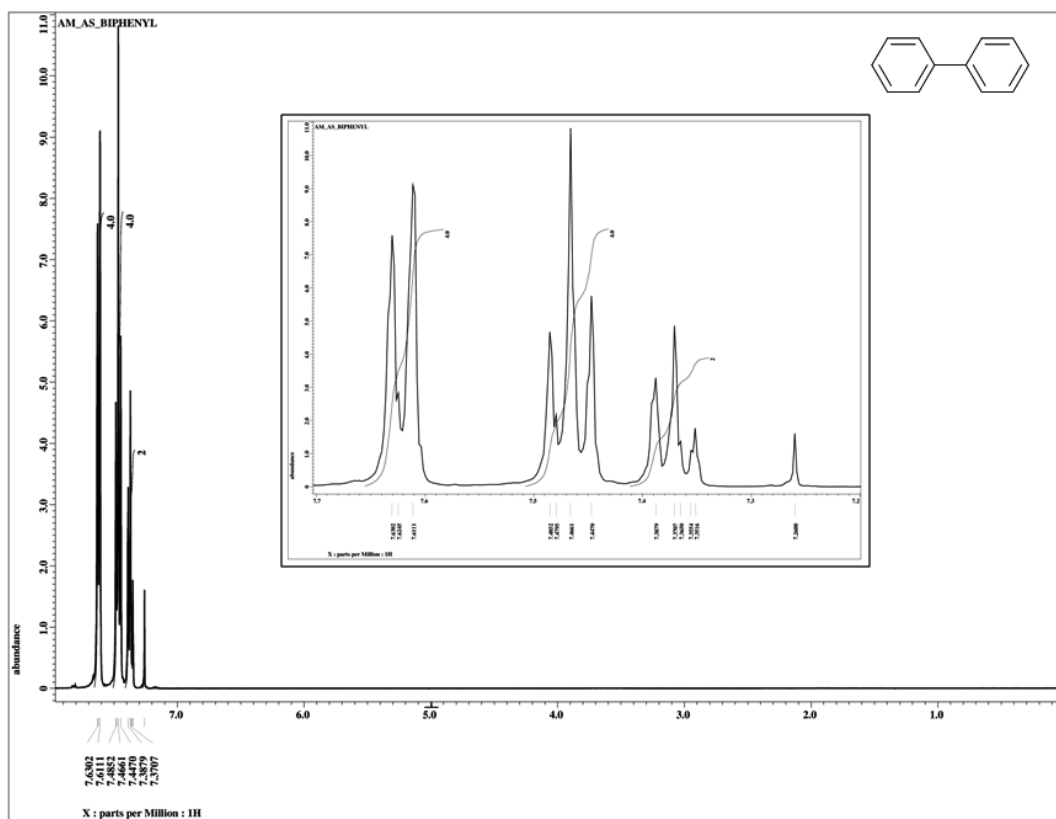

Fig. S6 <sup>1</sup>H-NMR of biphenyl in CDCl<sub>3</sub>

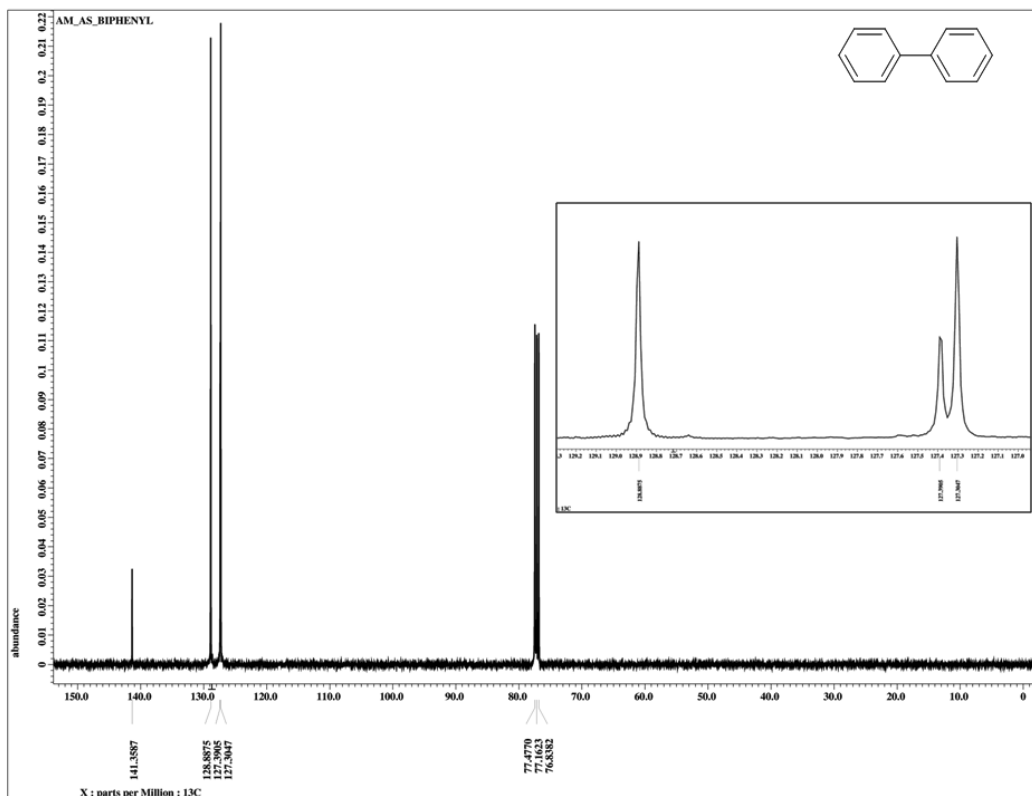

Fig. S7  $^{13}\text{C}$ -NMR of biphenyl in  $\text{CDCl}_3$ .

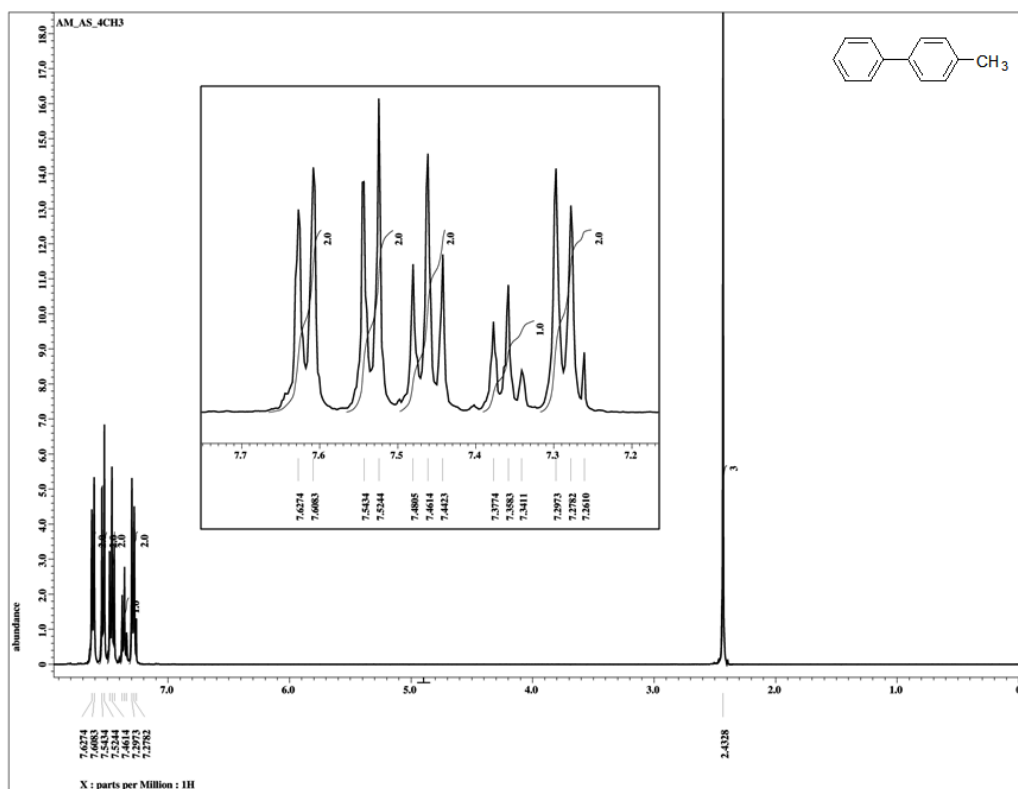

Fig. S8  $^1\text{H}$ -NMR of 4-methylbiphenyl in  $\text{CDCl}_3$ .



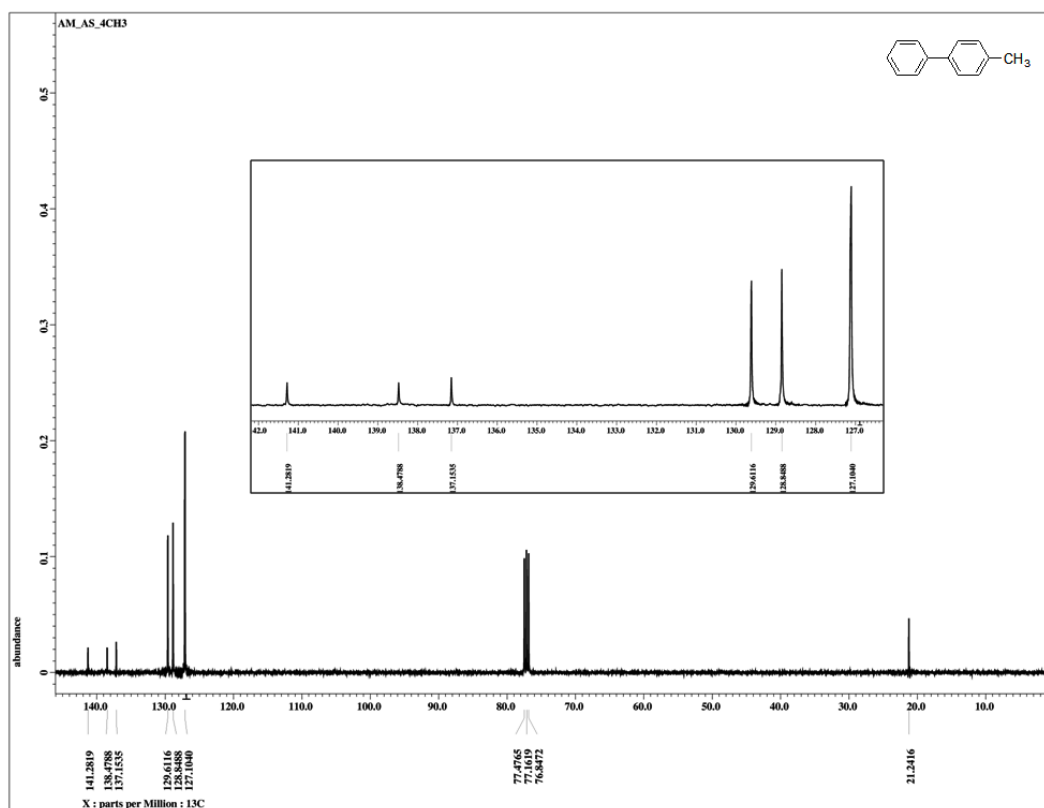

Fig. S9  $^{13}\text{C}$ -NMR of 4-methylbiphenyl in  $\text{CDCl}_3$ .

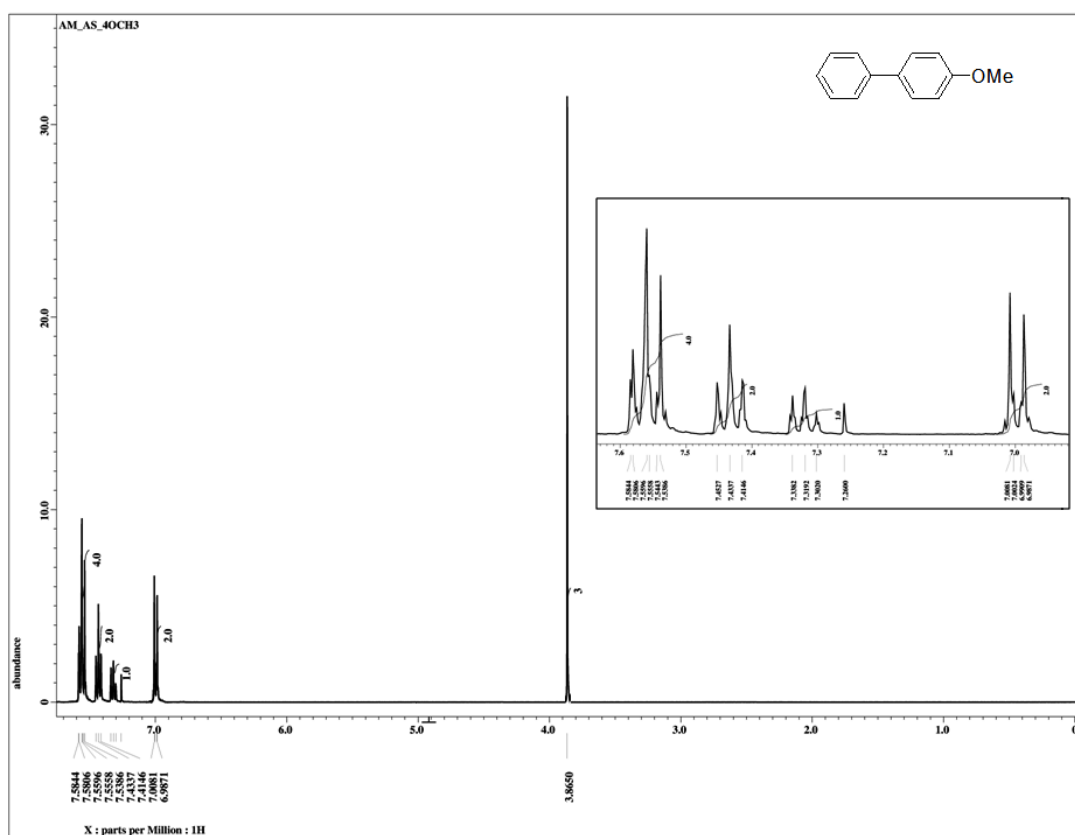

Fig. S10  $^1\text{H}$ -NMR of 4-methoxybiphenyl in  $\text{CDCl}_3$ .

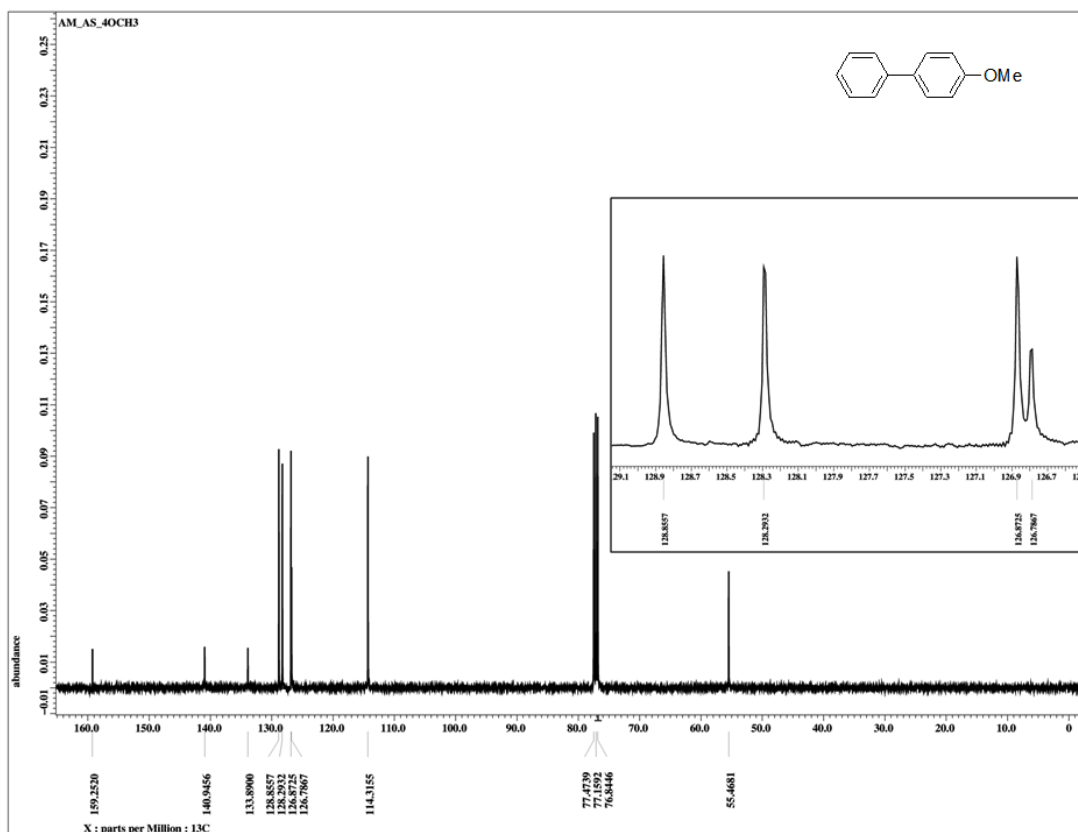

Fig. S11  $^{13}\text{C}$ -NMR of 4-methoxybiphenyl in  $\text{CDCl}_3$ .

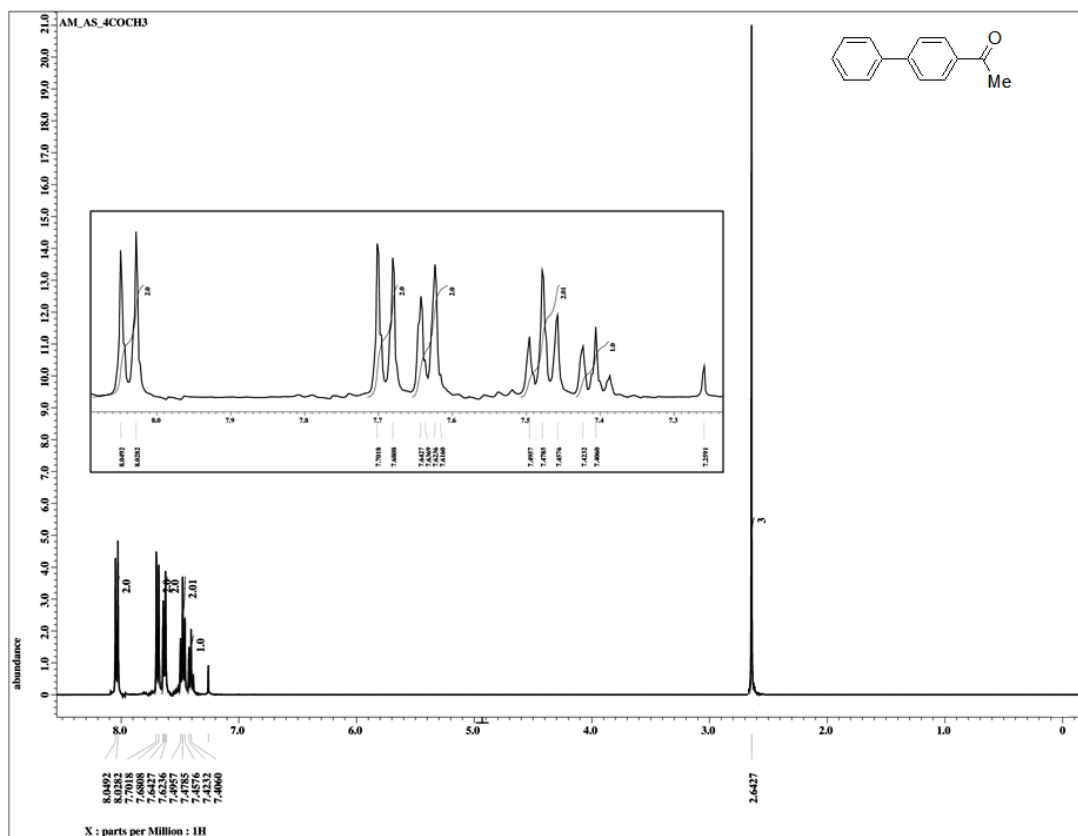

Fig. S12  $^1\text{H}$ -NMR of 4-acetylbiphenyl in  $\text{CDCl}_3$ .

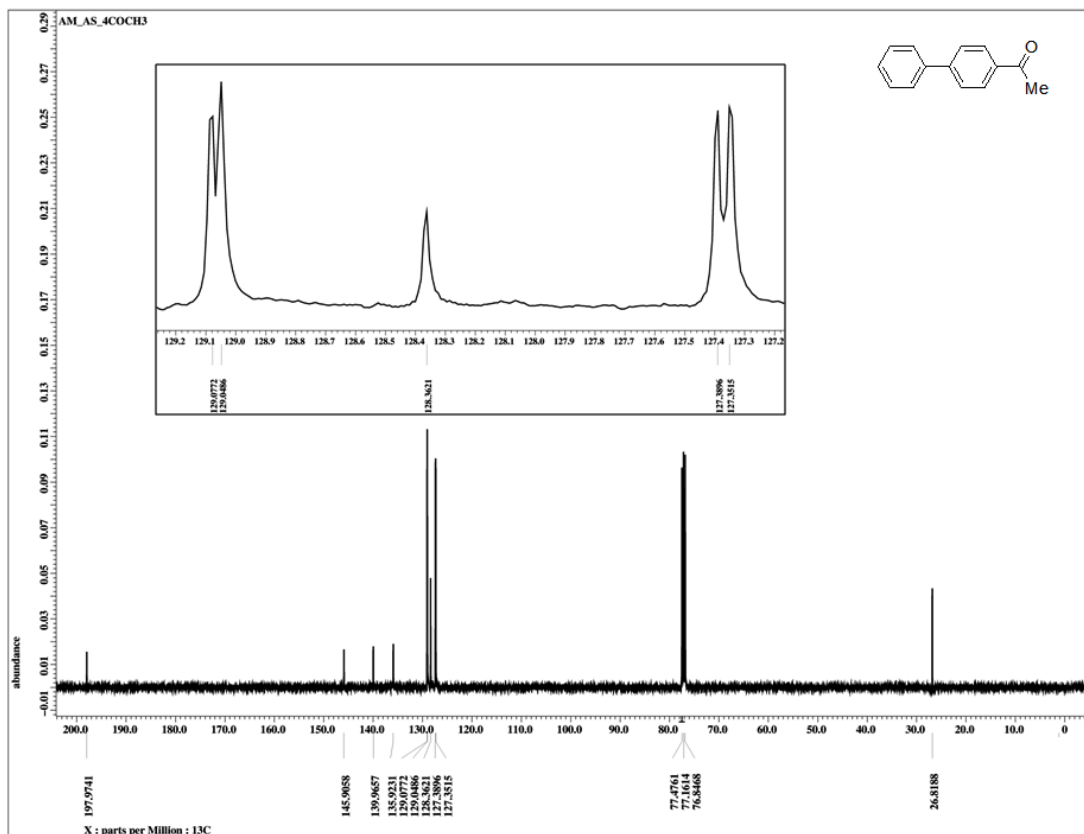

Fig. S13  $^{13}\text{C}$ -NMR of 4-acetylbiphenyl in  $\text{CDCl}_3$ .

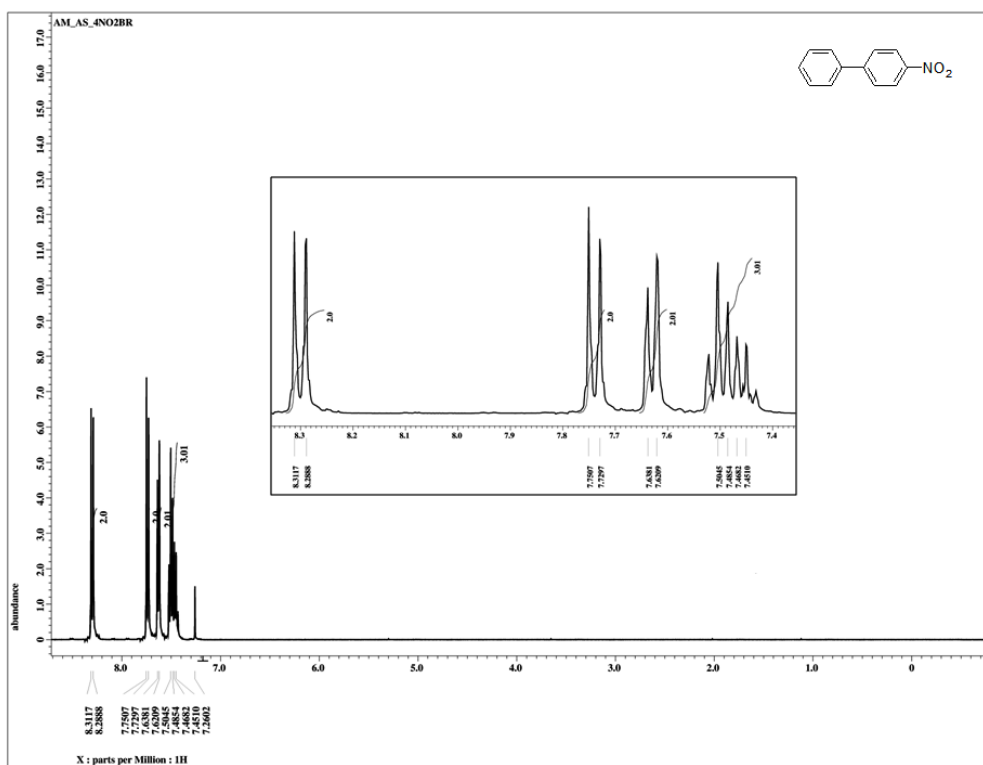

Fig. S14  $^1\text{H}$ -NMR of 4-nitrophenyl in  $\text{CDCl}_3$ .

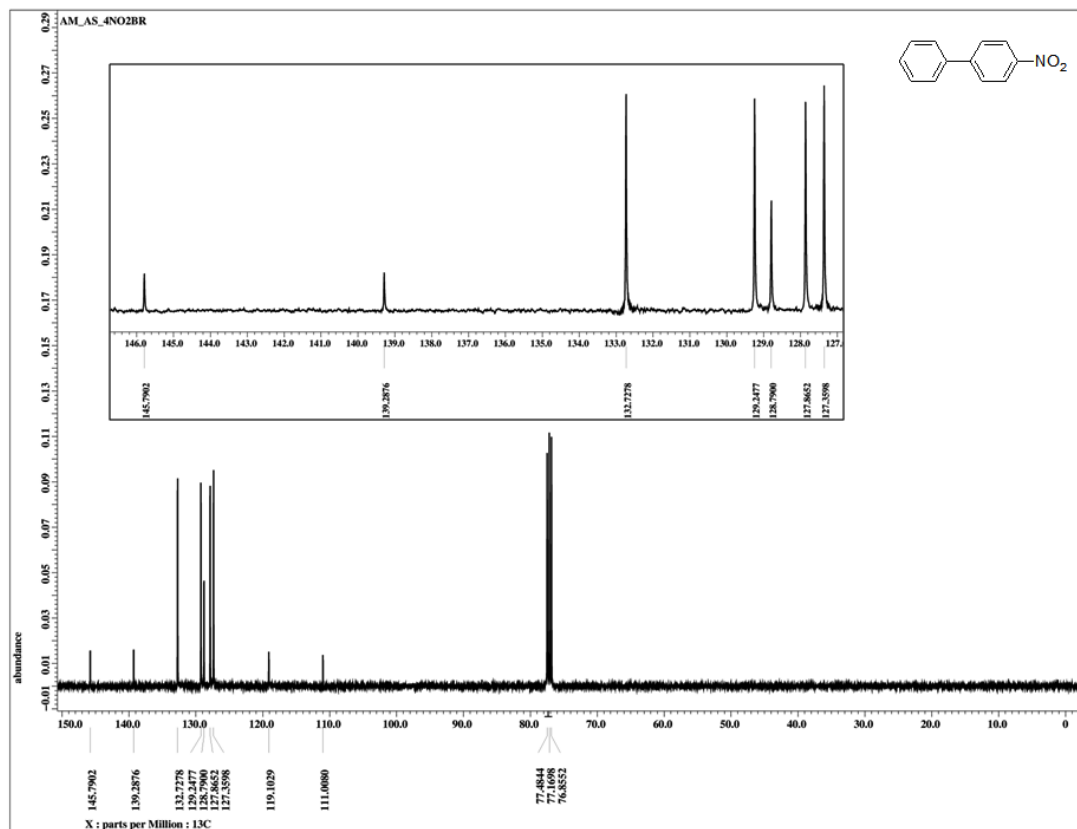

Fig. S15  $^{13}\text{C}$ -NMR of 4-nitrophenyl in  $\text{CDCl}_3$ .

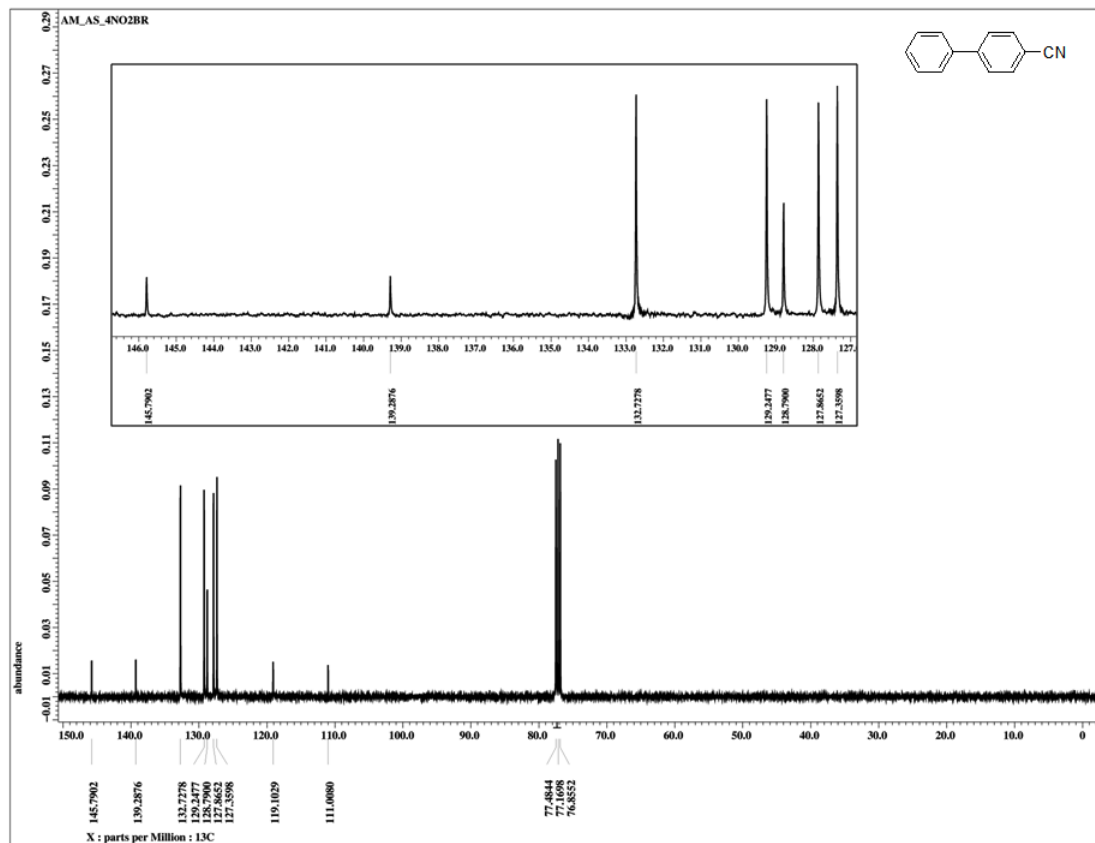

Fig. S16  $^{13}\text{C}$ -NMR of 4-cyanophenyl in  $\text{CDCl}_3$ .

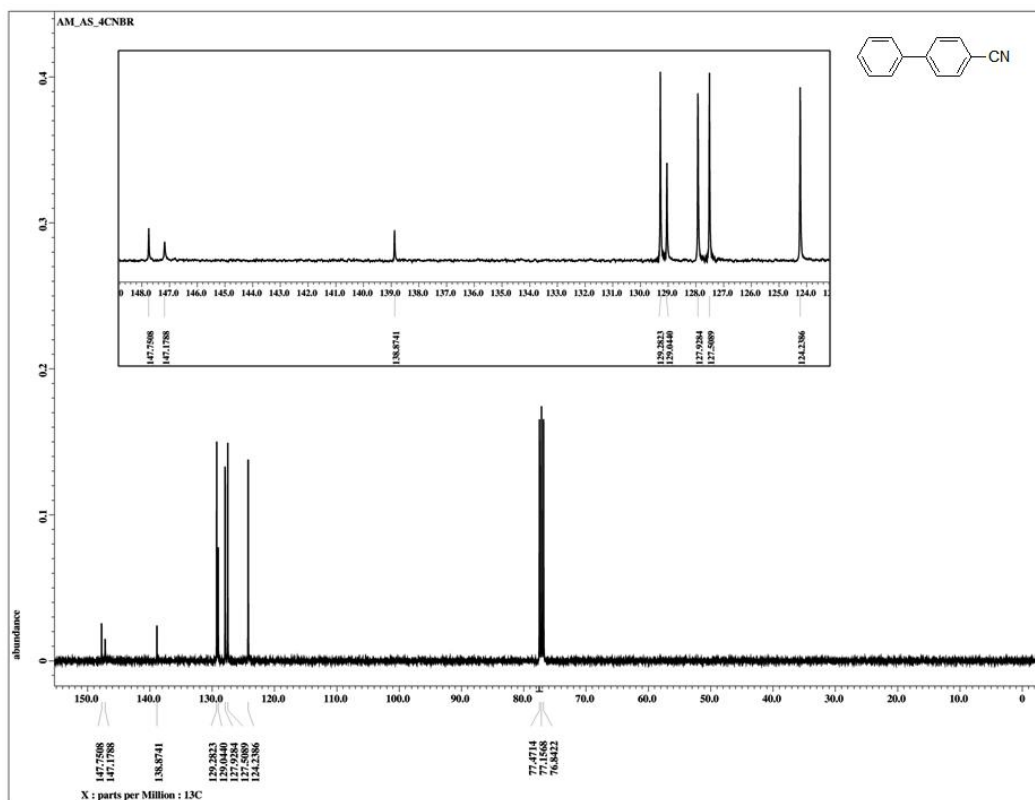

Fig. S17  $^{13}\text{C}$ -NMR of 4-cyanobiphenyl in  $\text{CDCl}_3$ .

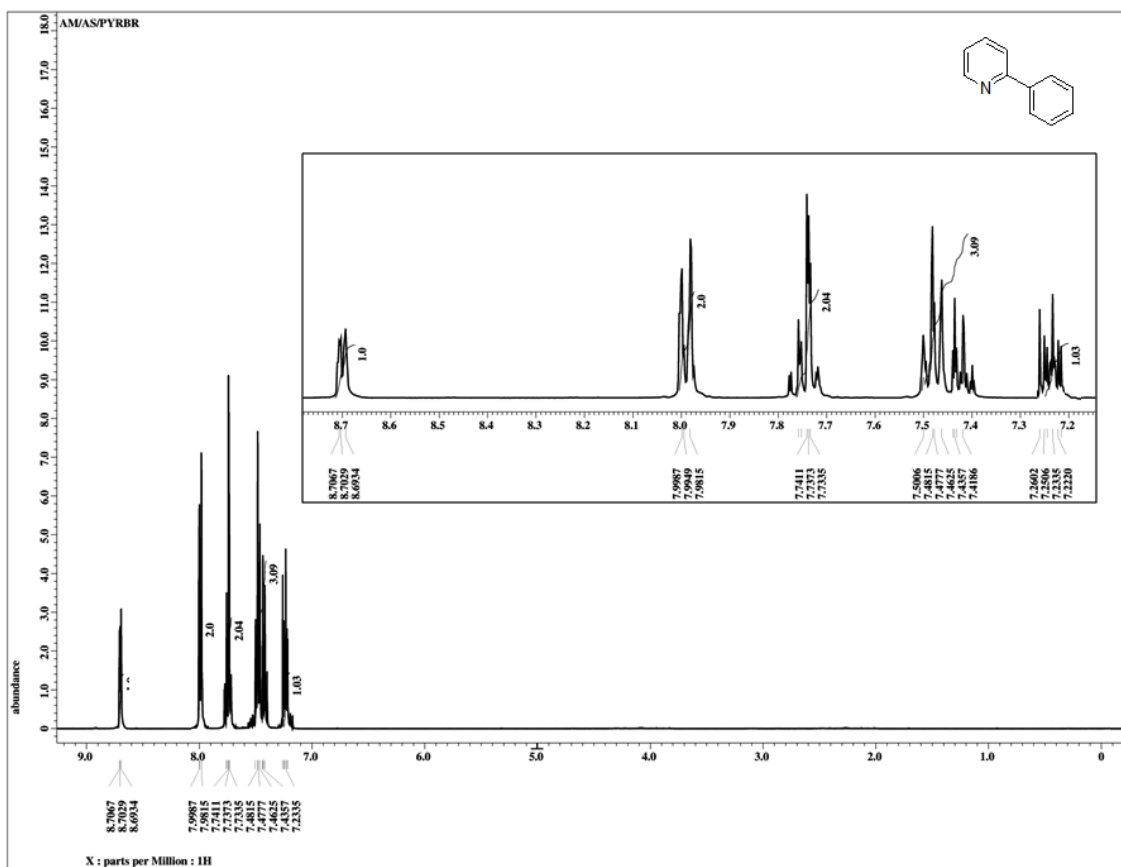

Fig. S18  $^1\text{H}$ -NMR of 2-phenylpyridine in  $\text{CDCl}_3$ .

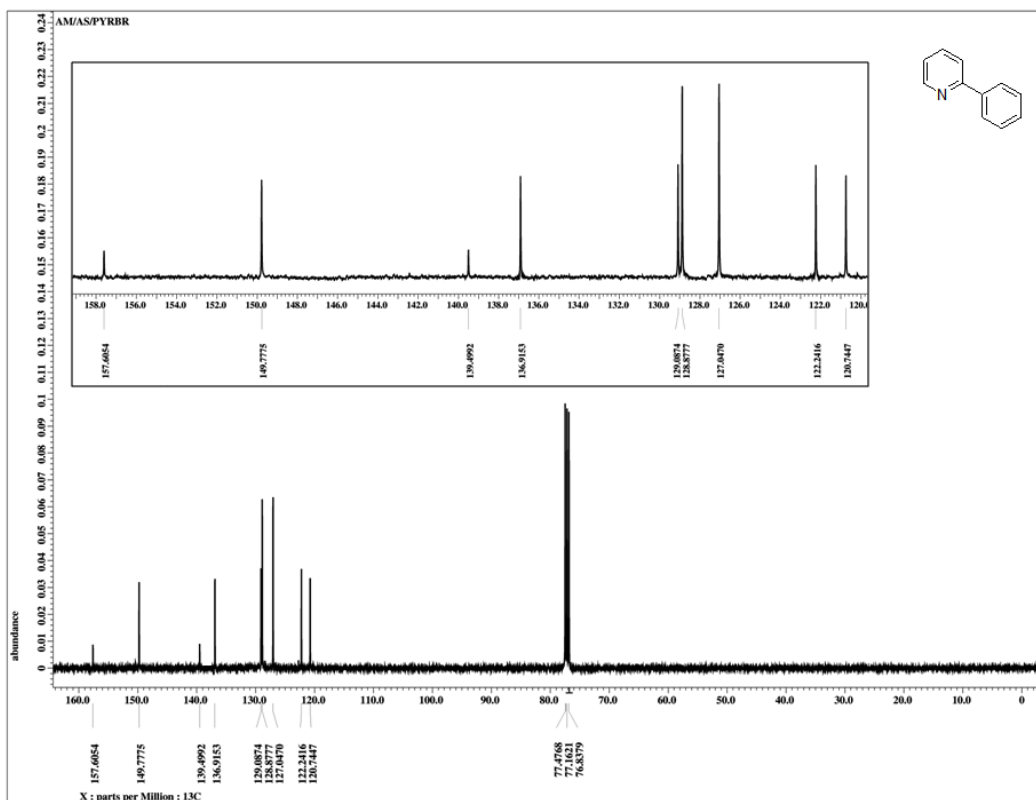

Fig. S19  $^{13}\text{C}$ -NMR of 2-phenylpyridine in  $\text{CDCl}_3$ .
